# Supplementary material
Source: publisher site journal article supplement (https://www.dovepress.com/article/475723)
Supplement: Supplementary file 1 [file get_supplementary_file.php]

Supplementary information for:

**Patients with chronic kidney disease cluster into two groups based on their health status and life satisfaction: differences in background factors**

**SUPPLEMENTARY TABLES**

**Supplementary Table S1. The survey responses from all patients who completed the whole survey, in the whole enrolled patient cohort, and in the two patient groups differing according to response variables as identified by cluster analysis.** The larger the standardized mean difference (SMD), the greater difference between Groups 1 and 2 distributions. Statistically significant differences between Groups 1 and 2 were assessed using the χ² test. Group 3 consisted of patients who did not answer the response variable questions. The preselected response variables used in clustering are indicated with a superscript “a”.

|  |  |  |  | **Cluster analysis** | | |  |  |
| --- | --- | --- | --- | --- | --- | --- | --- | --- |
| **Variable** |  | **Patients completing the whole survey**  **(n=395)** | **All patients**  **(n=558)** | **Group 1:**  **Patients with poorer well-being (n=241)** | **Group 2:**  **Patients with better well-being**  **(n=158)** | **Group 3:**  **Did not answer the response variable questions**  **(n=159)** | **SMD** | **P valueb** |
| **Age, n (%)** | |  |  |  |  |  | 0.28 | 0.103 |
|  | Information not available | 2 | 164 |  |  |  |  |  |
|  | <18 years | 2 (0.5) | 2 (0.5) | 0 (0.0) | 2 (1.3) | No response |  |  |
|  | 18–50 years | 44 (11.2) | 44 (11.2) | 30 (12.6) | 14 (9.0) | No response |  |  |
|  | 51–65 years | 127 (32.3) | 127 (32.2) | 68 (28.6) | 59 (37.8) | No response |  |  |
|  | 65–75 years | 139 (35.4) | 140 (35.5) | 87 (36.6) | 53 (34.0) | No response |  |  |
|  | >75 years | 81 (20.6) | 81 (20.6) | 53 (22.3) | 28 (17.9) | No response |  |  |
| **Sex, n (%)** | |  |  |  |  |  | 0.11 | 0.277 |
|  | Information not available | 4 | 166 |  |  |  |  |  |
|  | Male | 106 (27.1) | 107 (27.3) | 60 (25.3) | 47 (30.3) | No response |  |  |
|  | Female | 285 (72.9) | 285 (72.7) | 177 (74.7) | 108 (69.7) | No response |  |  |
| **Life situation, n (%)** | |  |  |  |  |  | 0.32 | 0.024 |
|  | Information not available | 3 | 165 |  |  |  |  |  |
|  | Retired | 293 (74.7) | 294 (74.8) | 189 (79.1) | 105 (68.2) | No response |  |  |
|  | Student | 3 (0.8) | 3 (0.8) | 2 (0.8) | 1 (0.6) | No response |  |  |
|  | Employed | 87 (22.2) | 87 (22.1) | 41 (17.2) | 46 (29.9) | No response |  |  |
|  | Unemployed | 9 (2.3) | 9 (2.3) | 7 (2.9) | 2 (1.3) | No response |  |  |
| **Living situation, n (%)** | |  |  |  |  |  | 0.26 | 0.100 |
|  | Information not available | 2 | 164 |  |  |  |  |  |
|  | Lives with a partner | 250 (63.6) | 251 (63.7) | 141 (59.0) | 110 (71.0) | No response |  |  |
|  | Lives with a family member | 17 (4.3) | 17 (4.3) | 11 (4.6) | 6 (3.9) | No response |  |  |
|  | Lives alone | 124 (31.6) | 124 (31.5) | 86 (36.0) | 38 (24.5) | No response |  |  |
|  | Lives in a care facility | 2 (0.5) | 2 (0.5) | 1 (0.4) | 1 (0.6) | No response |  |  |
| **Economic status, n (%)** | |  |  |  |  |  | 0.57 | <0.001 |
|  | Information not available | 3 | 165 |  |  |  |  |  |
|  | Very good | 39 (9.9) | 40 (10.2) | 21 (8.8) | 19 (12.3) | No response |  |  |
|  | Quite good | 123 (31.4) | 123 (31.3) | 55 (23.1) | 68 (43.9) | No response |  |  |
|  | Decent | 162 (41.3) | 162 (41.2) | 107 (45.0) | 55 (35.5) | No response |  |  |
|  | Quite poor | 48 (12.2) | 48 (12.2) | 39 (16.4) | 9 (5.8) | No response |  |  |
|  | Poor | 20 (5.1) | 20 (5.1) | 16 (6.7) | 4 (2.6) | No response |  |  |
| **Catchment area, n (%)** | |  |  |  |  |  | 0.128 | 0.821 |
|  | Information not available | 2 | 164 |  |  |  |  |  |
|  | Helsinki University Hospital | 175 (44.5) | 176 (44.7) | 102 (42.7) | 74 (47.7) | No response |  |  |
|  | Tampere University Hospital | 65 (16.5) | 65 (16.5) | 43 (18.0) | 22 (14.2) | No response |  |  |
|  | Kuopio University Hospital | 48 (12.2) | 48 (12.2) | 29 (12.1) | 19 (12.3) | No response |  |  |
|  | Oulu University Hospital | 40 (10.2) | 40 (10.2) | 24 (10.0) | 16 (10.3) | No response |  |  |
|  | Turku University Hospital | 65 (16.5) | 65 (16.5) | 41 (17.2) | 24 (15.5) | No response |  |  |
| **Time from diagnosis, n (%)** | |  |  |  |  |  | 0.13 | 0.015 |
|  | Not diagnosed | 0 (0.0) | 0 (0.0) | 0 (0.0) | 0 (0.0) | 0 (0.0) |  |  |
|  | <1 year | 50 (12.7) | 76 (13.6) | 35 (14.5) | 17 (10.8) | 24 (15.1) |  |  |
|  | 1–5 years | 159 (40.3) | 201 (36.0) | 91 (37.8) | 67 (42.4) | 43 (27.0) |  |  |
|  | 6–10 years | 76 (19.2) | 97 (17.4) | 47 (19.5) | 29 (18.4) | 21 (13.2) |  |  |
|  | >10 years | 110 (27.8) | 184 (33.0) | 68 (28.2) | 45 (28.5) | 71 (44.7) |  |  |
| **Place of diagnosis, n (%)** | |  |  |  |  |  | 0.36 | 0.654 |
|  | Information not available |  | 32 |  |  |  |  |  |
|  | At a health center in  conjunction with a routine  control visit due to another  disease | 107 (27.1) | 142 (27.0) | 70 (29.0) | 38 (24.1) | 34 (26.8) |  |  |
|  | During a health examination  at a health care center | 68 (17.2) | 81 (15.4) | 40 (16.6) | 30 (19.0) | 11 (8.7) |  |  |
|  | During a health check-up at  occupational health care | 60 (15.2) | 76 (14.4) | 27 (11.2) | 32 (20.3) | 17 (13.4) |  |  |
|  | In private health care | 22 (5.6) | 32 (6.1) | 10 (4.1) | 13 (8.2) | 9 (7.1) |  |  |
|  | On a hospital visit | 138 (34.9) | 195 (37.1) | 94 (39.0) | 45 (28.5) | 56 (44.1) |  |  |
| **Currently received care for CKD** | |  |  |  |  |  |  |  |
| **Follow-up visits, n (%)** | |  |  |  |  |  | 0.11 | 0.271 |
|  | Yes | 319 (80.8) | 387 (69.4) | 189 (78.4) | 131 (82.9) | 67 (42.1) |  |  |
|  | No | 76 (19.2) | 171 (30.6) | 52 (21.6) | 27 (17.1) | 92 (57.9) |  |  |
| **Medical treatment, n (%)** | |  |  |  |  |  | 0.02 | 0.839 |
|  | Yes | 131 (33.2) | 165 (29.6) | 80 (33.2) | 54 (34.2) | 31 (19.5) |  |  |
|  | No | 264 (66.8) | 393 (70.4) | 161 (66.8) | 104 (65.8) | 128 (80.5) |  |  |
| **Dialysis treatment, n (%)** | |  |  |  |  |  | 0.13 | 0.216 |
|  | Yes | 45 (11.4) | 59 (10.6) | 31 (12.9) | 14 (8.9) | 14 (8.8) |  |  |
|  | No | 350 (88.6) | 499 (89.4) | 210 (87.1) | 144 (91.1) | 145 (91.2) |  |  |
| **Organ transplant, n (%)** | |  |  |  |  |  | <0.001 | - |
|  | Yes | 0 (0.0) | 59 (10.6) | 0 (0.0) | 0 (0.0) | 59 (37.1) |  |  |
|  | No | 395 (100.0) | 499 (89.4) | 241 (100.0) | 158 (100.0) | 100 (62.9) |  |  |
| **Comorbidities** | |  |  |  |  |  |  |  |
| **Hypertension, n (%)** | |  |  |  |  |  | 0.20 | 0.056 |
|  | Yes | 281 (71.1) | 322 (57.7) | 180 (74.7) | 104 (65.8) | 38 (23.9) |  |  |
|  | No | 114 (28.9) | 236 (42.3) | 61 (25.3) | 54 (34.2) | 121 (76.1) |  |  |
| **Coronary heart disease, n (%)** | |  |  |  |  |  | 0.14 | 0.170 |
|  | Yes | 49 (12.4) | 56 (10.0) | 34 (14.1) | 15 (9.5) | 7 (4.4) |  |  |
|  | No | 346 (87.6) | 502 (90.0) | 207 (85.9) | 143 (90.5) | 152 (95.6) |  |  |
| **Heart failure, n (%)** | |  |  |  |  |  | 0.38 | <0.001 |
|  | Yes | 55 (13.9) | 62 (11.1) | 45 (18.7) | 10 (6.3) | 7 (4.4) |  |  |
|  | No | 340 (86.1) | 496 (88.9) | 196 (81.3) | 148 (93.7) | 152 (95.6) |  |  |
| **Stroke, n (%)** | |  |  |  |  |  | 0.13 | 0.211 |
|  | Yes | 31 (7.8) | 39 (7.0) | 22 (9.1) | 9 (5.7) | 8 (5.0) |  |  |
|  | No | 364 (92.2) | 519 (93.0) | 219 (90.9) | 149 (94.3) | 151 (95.0) |  |  |
| **Cancer, n (%)** | |  |  |  |  |  | 0.29 | 0.007 |
|  | Yes | 63 (15.9) | 73 (13.1) | 49 (20.3) | 16 (10.1) | 8 (5.0) |  |  |
|  | No | 332 (84.1) | 485 (86.9) | 192 (79.7) | 142 (89.9) | 151 (95.0) |  |  |
| **Arthritis, n (%)** | |  |  |  |  |  | 0.36 | 0.001 |
|  | Yes | 46 (11.6) | 49 (8.8) | 38 (15.8) | 8 (5.1) | 3 (1.9) |  |  |
|  | No | 349 (88.4) | 509 (91.2) | 203 (84.2) | 150 (94.9) | 156 (98.1) |  |  |
| **Type 1 diabetes, n (%)** | |  |  |  |  |  | 0.05 | 0.642 |
|  | Yes | 24 (6.1) | 28 (5.0) | 14 (5.8) | 11 (7.0) | 3 (1.9) |  |  |
|  | No | 371 (93.9) | 530 (95.0) | 227 (94.2) | 147 (93.0) | 156 (98.1) |  |  |
| **Type 2 diabetes, n (%)** | |  |  |  |  |  | 0.32 | 0.003 |
|  | Yes | 115 (29.1) | 132 (23.7) | 84 (34.9) | 33 (20.9) | 15 (9.4) |  |  |
|  | No | 280 (70.9) | 426 (76.3) | 157 (65.1) | 125 (79.1) | 144 (90.6) |  |  |
| **Thyroid disorder, n (%)** | |  |  |  |  |  | 0.23 | 0.027 |
|  | Yes | 112 (28.4) | 124 (22.2) | 78 (32.4) | 35 (22.2) | 11 (6.9) |  |  |
|  | No | 283 (71.6) | 434 (77.8) | 163 (67.6) | 123 (77.8) | 148 (93.1) |  |  |
| **Lung disease, n (%)** | |  |  |  |  |  | 0.29 | 0.006 |
|  | Yes | 80 (20.3) | 87 (15.6) | 59 (24.5) | 21 (13.3) | 7 (4.4) |  |  |
|  | No | 315 (79.7) | 471 (84.4) | 182 (75.5) | 137 (86.7) | 152 (95.6) |  |  |
| **Bowel disease, n (%)** | |  |  |  |  |  | 0.08 | 0.429 |
|  | Yes | 44 (11.1) | 45 (8.1) | 29 (12.0) | 15 (9.5) | 1 (0.6) |  |  |
|  | No | 351 (88.9) | 513 (91.9) | 212 (88.0) | 143 (90.5) | 158 (99.4) |  |  |
| **Liver disease, n (%)** | |  |  |  |  |  | 0.17 | 0.123 |
|  | Yes | 18 (4.6) | 21 (3.8) | 14 (5.8) | 4 (2.5) | 3 (1.9) |  |  |
|  | No | 377 (95.4) | 537 (96.2) | 227 (94.2) | 154 (97.5) | 156 (98.1) |  |  |
| **Musculoskeletal disorder, n (%)** | |  |  |  |  |  | 0.31 | 0.003 |
|  | Yes | 111 (28.1) | 117 (21.0) | 80 (33.2) | 31 (19.6) | 6 (3.8) |  |  |
|  | No | 284 (71.9) | 441 (79.0) | 161 (66.8) | 127 (80.4) | 153 (96.2) |  |  |
| **Ophthalmopathy, n (%)** | |  |  |  |  |  | 0.21 | 0.045 |
|  | Yes | 34 (8.6) | 38 (6.8) | 26 (10.8) | 8 (5.1) | 4 (2.5) |  |  |
|  | No | 361 (91.4) | 520 (93.2) | 215 (89.2) | 150 (94.9) | 155 (97.5) |  |  |
| **Mental disorder, n (%)** | |  |  |  |  |  | 0.18 | 0.097 |
|  | Yes | 43 (10.9) | 48 (8.6) | 31 (12.9) | 12 (7.6) | 5 (3.1) |  |  |
|  | No | 352 (89.1) | 510 (91.4) | 210 (87.1) | 146 (92.4) | 154 (96.9) |  |  |
| **Neurological disease, n (%)** | |  |  |  |  |  | 0.09 | 0.337 |
|  | Yes | 3 (0.8) | 4 (0.7) | 1 (0.4) | 2 (1.3) | 1 (0.6) |  |  |
|  | No | 392 (99.2) | 554 (99.3) | 240 (99.6) | 156 (98.7) | 158 (99.4) |  |  |
| **Dermatological disease, n (%)** | |  |  |  |  |  | 0.06 | 0.592 |
|  | Yes | 34 (8.6) | 38 (6.8) | 22 (9.1) | 12 (7.6) | 4 (2.5) |  |  |
|  | No | 361 (91.4) | 520 (93.2) | 219 (90.9) | 146 (92.4) | 155 (97.5) |  |  |
| **Other disease, n (%)** | |  |  |  |  |  | 0.03 | 0.776 |
|  | Yes | 76 (19.2) | 82 (14.7) | 47 (19.5) | 29 (18.4) | 6 (3.8) |  |  |
|  | No | 319 (80.8) | 476 (85.3) | 194 (80.5) | 129 (81.6) | 153 (96.2) |  |  |
| **No other diseases, n (%)** | |  |  |  |  |  | 0.24 | 0.018 |
|  | Yes | 29 (7.3) | 38 (6.8) | 12 (5.0) | 18 (11.4) | 8 (5.0) |  |  |
|  | No | 366 (92.7) | 520 (93.2) | 229 (95.0) | 140 (88.6) | 151 (95.0) |  |  |
| **Number of comorbidities, n (%)** | |  |  |  |  |  | 0.63 | <0.001 |
|  | 0 | 15 (3.8) | 119 (21.3) | 3 (1.2) | 12 (7.6) | 104 (65.4) |  |  |
|  | 1–2 | 151 (38.2) | 186 (33.3) | 77 (32.0) | 76 (48.1) | 33 (20.8) |  |  |
|  | 3–4 | 150 (38.0) | 167 (29.9) | 95 (39.4) | 57 (36.1) | 15 (9.4) |  |  |
|  | > 4 | 79 (20.0) | 86 (15.4) | 66 (27.4) | 13 (8.2) | 7 (4.4) |  |  |
| **Reason for CKD, n (%)** | |  |  |  |  |  | 0.34 | 0.135 |
|  | Information not available | 27 | 141 |  |  |  |  |  |
|  | Not known | 88 (23.9) | 107 (25.7) | 54 (23.7) | 34 (23.6) | 19 (42.2) |  |  |
|  | Something else | 56 (15.2) | 60 (14.4) | 30 (13.2) | 27 (18.8) | 3 (6.7) |  |  |
|  | Hereditary | 46 (12.5) | 49 (11.8) | 22 (9.6) | 24 (16.7) | 3 (6.7) |  |  |
|  | Comorbidity caused by  diabetes | 71 (19.3) | 79 (18.9) | 47 (20.6) | 24 (16.7) | 8 (17.8) |  |  |
|  | Comorbidity caused by  another disease | 68 (18.5) | 75 (18.0) | 50 (21.9) | 19 (13.2) | 6 (13.3) |  |  |
|  | High blood pressure | 34 (9.2) | 40 (9.6) | 21 (9.2) | 14 (9.7) | 5 (11.1) |  |  |
|  | Poor lifestyle | 5 (1.4) | 7 (1.7) | 4 (1.8) | 2 (1.4) | 1 (2.2) |  |  |
| **Need of help in understanding laboratory test results, n (%) a** | | 2 | 109 |  |  |  | 0.33 | 0.021 |
|  | Does not need help, has  understanding | 73 (18.6) | 88 (19.6) | 45 (18.7) | 30 (19.1) | 13 (25.5) |  |  |
|  | Does not need help but  knows how to access it if  needed | 119 (30.3) | 128 (28.5) | 63 (26.1) | 57 (36.3) | 8 (15.7) |  |  |
|  | Needs help and has  received it | 151 (38.4) | 171 (38.1) | 94 (39.0) | 59 (37.6) | 18 (35.3) |  |  |
|  | Needs help but does not  know how to access it | 50 (12.7) | 62 (13.8) | 39 (16.2) | 11 (7.0) | 12 (23.5) |  |  |
| **Care patient has received for CKD over time** | |  |  |  |  |  |  |  |
| **Medical treatment, n (%)** | |  |  |  |  |  | 0.03 | 0.782 |
|  | Yes | 183 (46.3) | 192 (34.4) | 111 (46.1) | 75 (47.5) | 6 (3.8) |  |  |
|  | No | 212 (53.7) | 366 (65.6) | 130 (53.9) | 83 (52.5) | 153 (96.2) |  |  |
| **Guidance on exercise, n (%)** | |  |  |  |  |  | 0.10 | 0.318 |
|  | Yes | 43 (10.9) | 43 (7.7) | 29 (12.0) | 14 (8.9) | 0 (0.0) |  |  |
|  | No | 352 (89.1) | 515 (92.3) | 212 (88.0) | 144 (91.1) | 159 (100.0) |  |  |
| **Guidance on diet, n (%)** | |  |  |  |  |  | 0.02 | 0.846 |
|  | Yes | 211 (53.4) | 216 (38.7) | 129 (53.5) | 83 (52.5) | 4 (2.5) |  |  |
|  | No | 184 (46.6) | 342 (61.3) | 112 (46.5) | 75 (47.5) | 155 (97.5) |  |  |
| **Psychological support from a health**  **care professional, n (%)** | |  |  |  |  |  | 0.13 | 0.211 |
|  | Yes | 55 (13.9) | 56 (10.0) | 29 (12.0) | 26 (16.5) | 1 (0.6) |  |  |
|  | No | 340 (86.1) | 502 (90.0) | 212 (88.0) | 132 (83.5) | 158 (99.4) |  |  |
| **Dialysis treatment, n (%)** | |  |  |  |  |  | 0.20 | 0.055 |
|  | Yes | 57 (14.4) | 57 (10.2) | 41 (17.0) | 16 (10.1) | 0 (0.0) |  |  |
|  | No | 338 (85.6) | 501 (89.8) | 200 (83.0) | 142 (89.9) | 159 (100.0) |  |  |
| **Other treatment, n (%)** | |  |  |  |  |  | 0.17 | 0.099 |
|  | Yes | 37 (9.4) | 42 (7.5) | 29 (12.0) | 11 (7.0) | 2 (1.3) |  |  |
|  | No | 358 (90.6) | 516 (92.5) | 212 (88.0) | 147 (93.0) | 157 (98.7) |  |  |
| **Has been offered guidance from a dietitian, n (%)** | |  |  |  |  |  | 0.11 | 0.308 |
|  | Information not available | 1 | 146 |  |  |  |  |  |
|  | Yes | 166 (42.1) | 172 (41.7) | 107 (44.4) | 62 (39.2) | 3 (23.1) |  |  |
|  | No | 228 (57.9) | 240 (58.3) | 134 (55.6) | 96 (60.8) | 10 (76.9) |  |  |
| **Follow-up visits with a physician at a health care center, n (%)** | |  |  |  |  |  | 0.13 | 0.213 |
|  | Yes | 110 (27.8) | 113 (20.3) | 61 (25.3) | 49 (31.0) | 3 (1.9) |  |  |
|  | No | 285 (72.2) | 445 (79.7) | 180 (74.7) | 109 (69.0) | 156 (98.1) |  |  |
| **Follow-up visits with a nurse at a health care center, n (%)** | |  |  |  |  |  | 0.03 | 0.740 |
|  | Yes | 38 (9.6) | 39 (7.0) | 22 (9.1) | 16 (10.1) | 1 (0.6) |  |  |
|  | No | 357 (90.4) | 519 (93.0) | 219 (90.9) | 142 (89.9) | 158 (99.4) |  |  |
| **Follow-up visits with an occupational health physician, n (%)** | |  |  |  |  |  | 0.16 | 0.101 |
|  | Yes | 12 (3.0) | 14 (2.5) | 5 (2.1) | 8 (5.1) | 1 (0.6) |  |  |
|  | No | 383 (97.0) | 544 (97.5) | 236 (97.9) | 150 (94.9) | 158 (99.4) |  |  |
| **Follow-up with visits with a private secondary care physician, n (%)** | |  |  |  |  |  | 0.05 | 0.624 |
|  | Yes | 13 (3.3) | 13 (2.3) | 7 (2.9) | 6 (3.8) | 0 (0.0) |  |  |
|  | No | 382 (96.7) | 545 (97.7) | 234 (97.1) | 152 (96.2) | 159 (100.0) |  |  |
| **Follow-up visits at a hospital outpatient clinic, n (%)** | |  |  |  |  |  | 0.06 | 0.590 |
|  | Yes | 188 (47.6) | 197 (35.3) | 118 (49.0) | 73 (46.2) | 6 (3.8) |  |  |
|  | No | 207 (52.4) | 361 (64.7) | 123 (51.0) | 85 (53.8) | 153 (96.2) |  |  |
| **No regular follow-up, n (%)** | |  |  |  |  |  | 0.17 | 0.104 |
|  | Yes | 56 (14.2) | 60 (10.8) | 40 (16.6) | 17 (10.8) | 3 (1.9) |  |  |
|  | No | 339 (85.8) | 498 (89.2) | 201 (83.4) | 141 (89.2) | 156 (98.1) |  |  |
| **Frequency of follow-up visits, n (%)** | |  |  |  |  |  | 0.43 | 0.004 |
|  | Information not available | 5 | 151 |  |  |  |  |  |
|  | Never | 27 (6.9) | 30 (7.4) | 25 (10.5) | 3 (1.9) | 2 (16.7) |  |  |
|  | Only when needed | 35 (9.0) | 37 (9.1) | 22 (9.3) | 13 (8.2) | 2 (16.7) |  |  |
|  | Approximately every other year | 16 (4.1) | 17 (4.2) | 6 (2.5) | 11 (7.0) | 0 (0.0) |  |  |
|  | Annually | 89 (22.8) | 91 (22.4) | 49 (20.7) | 41 (25.9) | 1 (8.3) |  |  |
|  | Two or more times per year | 223 (57.2) | 232 (57.0) | 135 (57.0) | 90 (57.0) | 7 (58.3) |  |  |
| **Are the follow-up visits arranged by invitations or by patient themselves booking an appointment, n (%)** | |  |  |  |  |  | 0.26 | 0.117 |
|  | Information not available | 10 | 156 |  |  |  |  |  |
|  | New appointment provided  in a letter or by phone | 217 (56.4) | 225 (56.0) | 135 (57.7) | 85 (54.5) | 5 (41.7) |  |  |
|  | Goes to emergency care if  condition worsens | 25 (6.5) | 28 (7.0) | 19 (8.1) | 7 (4.5) | 2 (16.7) |  |  |
|  | Books appointment  independently | 134 (34.8) | 139 (34.6) | 72 (30.8) | 62 (39.7) | 5 (41.7) |  |  |
|  | Has unsuccessfully  attempted to book an  appointment | 9 (2.3) | 10 (2.5) | 8 (3.4) | 2 (1.3) | 0 (0.0) |  |  |
| **Has a written plan of care, n (%)** | |  |  |  |  |  | 0.10 | 0.351 |
|  | Information not available | 1 | 146 |  |  |  |  |  |
|  | Yes | 71 (18.0) | 73 (17.7) | 47 (19.5) | 25 (15.8) | 1 (7.7) |  |  |
|  | No | 323 (82.0) | 339 (82.3) | 194 (80.5) | 133 (84.2) | 12 (92.3) |  |  |
| **Has a written rehabilitation plan, n (%)** | |  |  |  |  |  | 0.02 | 0.819 |
|  | Information not available | 2 | 147 |  |  |  |  |  |
|  | Yes | 11 (2.8) | 11 (2.7) | 7 (2.9) | 4 (2.5) | 0 (0.0) |  |  |
|  | No | 382 (97.2) | 400 (97.3) | 233 (97.1) | 154 (97.5) | 13 (100.0) |  |  |
| **Has been listened to when planning the treatment and has been able to have a say, n (%)** | |  |  |  |  |  | 0.09 | 0.395 |
|  | Information not available | 2 | 147 |  |  |  |  |  |
|  | Yes | 164 (41.7) | 168 (40.9) | 96 (40.0) | 70 (44.3) | 2 (15.4) |  |  |
|  | No | 229 (58.3) | 243 (59.1) | 144 (60.0) | 88 (55.7) | 11 (84.6) |  |  |
| **A close family member has been invited to planning of care, n (%)** | |  |  |  |  |  | 0.15 | 0.157 |
|  | Information not available | 4 | 149 |  |  |  |  |  |
|  | Yes | 36 (9.2) | 39 (9.5) | 27 (11.3) | 11 (7.0) | 1 (7.7) |  |  |
|  | No | 355 (90.8) | 370 (90.5) | 212 (88.7) | 146 (93.0) | 12 (92.3) |  |  |
| **Has received information about the disease from a physician, n (%)** | |  |  |  |  |  | 0.19 | 0.065 |
|  | Yes | 310 (78.5) | 320 (57.3) | 181 (75.1) | 131 (82.9) | 8 (5.0) |  |  |
|  | No | 85 (21.5) | 238 (42.7) | 60 (24.9) | 27 (17.1) | 151 (95.0) |  |  |
| **Has received information about the disease from a nurse, n (%)** | |  |  |  |  |  | 0.06 | 0.553 |
|  | Yes | 129 (32.7) | 133 (23.8) | 77 (32.0) | 55 (34.8) | 1 (0.6) |  |  |
|  | No | 266 (67.3) | 425 (76.2) | 164 (68.0) | 103 (65.2) | 158 (99.4) |  |  |
| **Has received information about the disease from a pharmacy, n (%)** | |  |  |  |  |  | 0.09 | 0.397 |
|  | Yes | 11 (2.8) | 11 (2.0) | 8 (3.3) | 3 (1.9) | 0 (0.0) |  |  |
|  | No | 384 (97.2) | 547 (98.0) | 233 (96.7) | 155 (98.1) | 159 (100.0) |  |  |
| **Has received information about the disease from a friend or relative, n (%)** | |  |  |  |  |  | 0.04 | 0.715 |
|  | Yes | 28 (7.1) | 29 (5.2) | 16 (6.6) | 12 (7.6) | 1 (0.6) |  |  |
|  | No | 367 (92.9) | 529 (94.8) | 225 (93.4) | 146 (92.4) | 158 (99.4) |  |  |
| **Has received information about the disease from the Finnish Kidney and Liver Association website, n (%)** | |  |  |  |  |  | 0.15 | 0.143 |
|  | Yes | 183 (46.3) | 186 (33.3) | 104 (43.2) | 80 (50.6) | 2 (1.3) |  |  |
|  | No | 212 (53.7) | 372 (66.7) | 137 (56.8) | 78 (49.4) | 157 (98.7) |  |  |
| **Has received information about the disease elsewhere on the internet, n (%)** | |  |  |  |  |  | 0.10 | 0.343 |
|  | Yes | 188 (47.6) | 195 (34.9) | 120 (49.8) | 71 (44.9) | 4 (2.5) |  |  |
|  | No | 207 (52.4) | 363 (65.1) | 121 (50.2) | 87 (55.1) | 155 (97.5) |  |  |
| **Has received information about the disease from newspapers or magazines, n (%)** | |  |  |  |  |  | 0.11 | 0.282 |
|  | Yes | 59 (14.9) | 61 (10.9) | 40 (16.6) | 20 (12.7) | 1 (0.6) |  |  |
|  | No | 336 (85.1) | 497 (89.1) | 201 (83.4) | 138 (87.3) | 158 (99.4) |  |  |
| **Has received information about the disease from a peer support person, n (%)** | |  |  |  |  |  | 0.14 | 0.172 |
|  | Yes | 26 (6.6) | 26 (4.7) | 19 (7.9) | 7 (4.4) | 0 (0.0) |  |  |
|  | No | 369 (93.4) | 532 (95.3) | 222 (92.1) | 151 (95.6) | 159 (100.0) |  |  |
| **Has received information about the disease from elsewhere, n (%)** | |  |  |  |  |  | 0.01 | 0.897 |
|  | Yes | 21 (5.3) | 25 (4.5) | 13 (5.4) | 9 (5.7) | 3 (1.9) |  |  |
|  | No | 374 (94.7) | 533 (95.5) | 228 (94.6) | 149 (94.3) | 156 (98.1) |  |  |
| **Knows what causes the disease and how it can be treated at home, n (%)** | |  |  |  |  |  | 0.26 | 0.011 |
|  | Yes | 159 (40.3) | 165 (29.6) | 85 (35.3) | 76 (48.1) | 4 (2.5) |  |  |
|  | No | 236 (59.7) | 393 (70.4) | 156 (64.7) | 82 (51.9) | 155 (97.5) |  |  |
| **Knows what each medication targets, n (%)** | |  |  |  |  |  | 0.06 | 0.554 |
|  | Yes | 145 (36.7) | 151 (27.1) | 86 (35.7) | 61 (38.6) | 4 (2.5) |  |  |
|  | No | 250 (63.3) | 407 (72.9) | 155 (64.3) | 97 (61.4) | 155 (97.5) |  |  |
| **Knows how to eat to promote health, n (%)** | |  |  |  |  |  | 0.18 | 0.073 |
|  | Yes | 188 (47.6) | 193 (34.6) | 106 (44.0) | 84 (53.2) | 3 (1.9) |  |  |
|  | No | 207 (52.4) | 365 (65.4) | 135 (56.0) | 74 (46.8) | 156 (98.1) |  |  |
| **Feels taken care of, n (%)** | |  |  |  |  |  | 0.21 | 0.044 |
|  | Yes | 136 (34.4) | 139 (24.9) | 74 (30.7) | 64 (40.5) | 1 (0.6) |  |  |
|  | No | 259 (65.6) | 419 (75.1) | 167 (69.3) | 94 (59.5) | 158 (99.4) |  |  |
| **Feels that a loved one has also received support, n (%)** | |  |  |  |  |  | 0.03 | 0.750 |
|  | Yes | 22 (5.6) | 23 (4.1) | 14 (5.8) | 8 (5.1) | 1 (0.6) |  |  |
|  | No | 373 (94.4) | 535 (95.9) | 227 (94.2) | 150 (94.9) | 158 (99.4) |  |  |
| **Feels uncertainty over the disease and its care, n (%)** | |  |  |  |  |  | 0.24 | 0.021 |
|  | Yes | 105 (26.6) | 111 (19.9) | 74 (30.7) | 32 (20.3) | 5 (3.1) |  |  |
|  | No | 290 (73.4) | 447 (80.1) | 167 (69.3) | 126 (79.7) | 154 (96.9) |  |  |
| **Feels uncertainty over medication or does not understand it, n (%)** | |  |  |  |  |  | 0.06 | 0.579 |
|  | Yes | 18 (4.6) | 19 (3.4) | 12 (5.0) | 6 (3.8) | 1 (0.6) |  |  |
|  | No | 377 (95.4) | 539 (96.6) | 229 (95.0) | 152 (96.2) | 158 (99.4) |  |  |
| **Feels that close family members have not received adequate information about disease, n (%)** | |  |  |  |  |  | 0.19 | 0.073 |
|  | Yes | 48 (12.2) | 53 (9.5) | 36 (14.9) | 14 (8.9) | 3 (1.9) |  |  |
|  | No | 347 (87.8) | 505 (90.5) | 205 (85.1) | 144 (91.1) | 156 (98.1) |  |  |
| **Feels that concerns are not heard, n (%)** | |  |  |  |  |  | 0.08 | 0.421 |
|  | Yes | 36 (9.1) | 36 (6.5) | 24 (10.0) | 12 (7.6) | 0 (0.0) |  |  |
|  | No | 359 (90.9) | 522 (93.5) | 217 (90.0) | 146 (92.4) | 159 (100.0) |  |  |
| **Is not sure how to have an effect on health or disease via lifestyle choices, n (%)** | |  |  |  |  |  | 0.16 | 0.118 |
|  | Yes | 73 (18.5) | 78 (14.0) | 50 (20.7) | 23 (14.6) | 5 (3.1) |  |  |
|  | No | 322 (81.5) | 480 (86.0) | 191 (79.3) | 135 (85.4) | 154 (96.9) |  |  |
| **Contact point for asking for advice on disease, n (%)** | |  |  |  |  |  | 0.34 | 0.182 |
|  | Information not available | 3 | 149 |  |  |  |  |  |
|  | Physician at a private  practice | 18 (4.6) | 19 (4.6) | 10 (4.2) | 8 (5.1) | 1 (8.3) |  |  |
|  | Physician at a hospital | 99 (25.3) | 104 (25.4) | 60 (25.1) | 41 (25.9) | 3 (25.0) |  |  |
|  | Physician at a health care  center | 71 (18.1) | 74 (18.1) | 36 (15.1) | 36 (22.8) | 2 (16.7) |  |  |
|  | Nurse at a hospital | 88 (22.4) | 91 (22.2) | 53 (22.2) | 36 (22.8) | 2 (16.7) |  |  |
|  | Nurse at a health care  center | 42 (10.7) | 42 (10.3) | 26 (10.9) | 16 (10.1) | 0 (0.0) |  |  |
|  | Peer support group or  person | 5 (1.3) | 5 (1.2) | 4 (1.7) | 1 (0.6) | 0 (0.0) |  |  |
|  | Someone else | 10 (2.6) | 10 (2.4) | 5 (2.1) | 5 (3.2) | 0 (0.0) |  |  |
|  | No contact point for advice | 59 (15.1) | 64 (15.6) | 45 (18.8) | 15 (9.5) | 4 (33.3) |  |  |
| **Takes medication regularly, n (%)** | |  |  |  |  |  | 0.06 | 0.574 |
|  | Yes | 291 (73.7) | 294 (52.7) | 180 (74.7) | 114 (72.2) | 0 (0.0) |  |  |
|  | No | 104 (26.3) | 264 (47.3) | 61 (25.3) | 44 (27.8) | 159 (100.0) |  |  |
| **Measures blood pressure regularly, n (%)** | |  |  |  |  |  | 0.04 | 0.676 |
|  | Yes | 271 (68.6) | 273 (48.9) | 163 (67.6) | 110 (69.6) | 0 (0.0) |  |  |
|  | No | 124 (31.4) | 285 (51.1) | 78 (32.4) | 48 (30.4) | 159 (100.0) |  |  |
| **Measures weight regularly, n (%)** | |  |  |  |  |  | 0.04 | 0.702 |
|  | Yes | 213 (53.9) | 215 (38.5) | 128 (53.1) | 87 (55.1) | 0 (0.0) |  |  |
|  | No | 182 (46.1) | 343 (61.5) | 113 (46.9) | 71 (44.9) | 159 (100.0) |  |  |
| **Measures blood glucose levels, n (%)** | |  |  |  |  |  | 0.21 | 0.041 |
|  | Yes | 118 (29.9) | 119 (21.3) | 81 (33.6) | 38 (24.1) | 0 (0.0) |  |  |
|  | No | 277 (70.1) | 439 (78.7) | 160 (66.4) | 120 (75.9) | 159 (100.0) |  |  |
| **Has daily activity, n (%)** | |  |  |  |  |  | 0.59 | <0.001 |
|  | Yes | 222 (56.2) | 223 (40.0) | 108 (44.8) | 115 (72.8) | 0 (0.0) |  |  |
|  | No | 173 (43.8) | 335 (60.0) | 133 (55.2) | 43 (27.2) | 159 (100.0) |  |  |
| **Adheres to dietary instructions, n (%)** | |  |  |  |  |  | 0.22 | 0.036 |
|  | Yes | 135 (34.2) | 137 (24.6) | 73 (30.3) | 64 (40.5) | 0 (0.0) |  |  |
|  | No | 260 (65.8) | 421 (75.4) | 168 (69.7) | 94 (59.5) | 159 (100.0) |  |  |
| **Aims to avoid excess intake of salt, n (%)** | |  |  |  |  |  | 0.28 | 0.008 |
|  | Yes | 287 (72.7) | 289 (51.8) | 163 (67.6) | 126 (79.7) | 0 (0.0) |  |  |
|  | No | 108 (27.3) | 269 (48.2) | 78 (32.4) | 32 (20.3) | 159 (100.0) |  |  |
| **Has lost weight, n (%)** | |  |  |  |  |  | 0.02 | 0.882 |
|  | Yes | 93 (23.5) | 95 (17.0) | 58 (24.1) | 37 (23.4) | 0 (0.0) |  |  |
|  | No | 302 (76.5) | 463 (83.0) | 183 (75.9) | 121 (76.6) | 159 (100.0) |  |  |
| **Does not consume alcohol frequently, n (%)** | |  |  |  |  |  | 0.08 | 0.422 |
|  | Yes | 319 (80.8) | 321 (57.5) | 197 (81.7) | 124 (78.5) | 0 (0.0) |  |  |
|  | No | 76 (19.2) | 237 (42.5) | 44 (18.3) | 34 (21.5) | 159 (100.0) |  |  |
| **Does not smoke, n (%)** | |  |  |  |  |  | 0.13 | 0.197 |
|  | Yes | 308 (78.0) | 310 (55.6) | 182 (75.5) | 128 (81.0) | 0 (0.0) |  |  |
|  | No | 87 (22.0) | 248 (44.4) | 59 (24.5) | 30 (19.0) | 159 (100.0) |  |  |
| **Experienced health status, n (%)a** | |  |  |  |  |  | 8.78 | <0.001 |
|  | Information not available | 1 | 159 |  |  |  |  |  |
|  | Poor | 37 (9.4) | 38 (9.5) | 38 (15.8) | 0 (0.0) | No response |  |  |
|  | Satisfactory | 170 (43.1) | 171 (42.9) | 171 (71.0) | 0 (0.0) | No response |  |  |
|  | Varies | 31 (7.9) | 33 (8.3) | 30 (12.4) | 3 (1.9) | No response |  |  |
|  | Good | 98 (24.9) | 98 (24.6) | 2 (0.8) | 96 (60.8) | No response |  |  |
|  | Very good | 53 (13.5) | 54 (13.5) | 0 (0.0) | 54 (34.2) | No response |  |  |
|  | Excellent | 5 (1.3) | 5 (1.3) | 0 (0.0) | 5 (3.2) | No response |  |  |
| **Life satisfaction, n (%)a** | |  |  |  |  |  | 1.20 | <0.001 |
|  | Information not available | 1 | 159 |  |  |  |  |  |
|  | Very dissatisfied | 9 (2.3) | 9 (2.3) | 8 (3.3) | 1 (0.6) | No response |  |  |
|  | Fairly dissatisfied | 37 (9.4) | 38 (9.5) | 36 (14.9) | 2 (1.3) | No response |  |  |
|  | Not satisfied but not dissatisfied | 112 (28.4) | 114 (28.6) | 97 (40.2) | 17 (10.8) | No response |  |  |
|  | Fairly satisfied | 192 (48.7) | 194 (48.6) | 93 (38.6) | 101 (63.9) | No response |  |  |
|  | Very satisfied | 44 (11.2) | 44 (11.0) | 7 (2.9) | 37 (23.4) | No response |  |  |
| **Experience of loneliness, n (%)a** | |  |  |  |  |  | 0.70 | <0.001 |
|  | Information not available | 2 | 160 |  |  |  |  |  |
|  | Constantly | 13 (3.3) | 14 (3.5) | 13 (5.4) | 1 (0.6) | No response |  |  |
|  | Quite often | 46 (11.7) | 46 (11.6) | 40 (16.7) | 6 (3.8) | No response |  |  |
|  | Sometimes | 134 (34.1) | 136 (34.2) | 91 (37.9) | 45 (28.5) | No response |  |  |
|  | Rarely | 130 (33.1) | 130 (32.7) | 68 (28.3) | 62 (39.2) | No response |  |  |
|  | Never | 70 (17.8) | 72 (18.1) | 28 (11.7) | 44 (27.8) | No response |  |  |
| **CKD has not affected mood, n (%)a** | |  |  |  |  |  | 0.42 | <0.001 |
|  | Yes | 76 (19.2) | 78 (14.0) | 31 (12.9) | 47 (29.7) | 0 (0.0) |  |  |
|  | No | 319 (80.8) | 480 (86.0) | 210 (87.1) | 111 (70.3) | 159 (100.0) |  |  |
| **Feels relieved that there is an explanation for the symptoms, n (%)a** | |  |  |  |  |  | 0.11 | 0.260 |
|  | Yes | 54 (13.7) | 56 (10.0) | 30 (12.4) | 26 (16.5) | 0 (0.0) |  |  |
|  | No | 341 (86.3) | 502 (90.0) | 211 (87.6) | 132 (83.5) | 159 (100.0) |  |  |
| **Disease has caused sadness, n (%)a** | |  |  |  |  |  | 0.25 | 0.020 |
|  | Yes | 67 (17.0) | 67 (12.0) | 49 (20.3) | 18 (11.4) | 0 (0.0) |  |  |
|  | No | 328 (83.0) | 491 (88.0) | 192 (79.7) | 140 (88.6) | 159 (100.0) |  |  |
| **Has fear over disease, n (%)a** | |  |  |  |  |  | 0.25 | 0.019 |
|  | Yes | 73 (18.5) | 73 (13.1) | 53 (22.0) | 20 (12.7) | 0 (0.0) |  |  |
|  | No | 322 (81.5) | 485 (86.9) | 188 (78.0) | 138 (87.3) | 159 (100.0) |  |  |
| **Thinks often how disease will affect the rest of the life, n (%)a** | |  |  |  |  |  | 0.16 | 0.111 |
|  | Yes | 203 (51.4) | 204 (36.6) | 131 (54.4) | 73 (46.2) | 0 (0.0) |  |  |
|  | No | 192 (48.6) | 354 (63.4) | 110 (45.6) | 85 (53.8) | 159 (100.0) |  |  |
| **Has been depressed, n (%)a** | |  |  |  |  |  | 0.41 | <0.001 |
|  | Yes | 50 (12.7) | 51 (9.1) | 43 (17.8) | 8 (5.1) | 0 (0.0) |  |  |
|  | No | 345 (87.3) | 507 (90.9) | 198 (82.2) | 150 (94.9) | 159 (100.0) |  |  |
| **Has been sad but has learned to live with the disease, n (%)a** | |  |  |  |  |  | 0.12 | 0.254 |
|  | Yes | 97 (24.6) | 98 (17.6) | 64 (26.6) | 34 (21.5) | 0 (0.0) |  |  |
|  | No | 298 (75.4) | 460 (82.4) | 177 (73.4) | 124 (78.5) | 159 (100.0) |  |  |

aPreselected response variable that was used in clustering.

bDifference between Groups 1 and 2.

**SUPPLEMENTARY FIGURES**


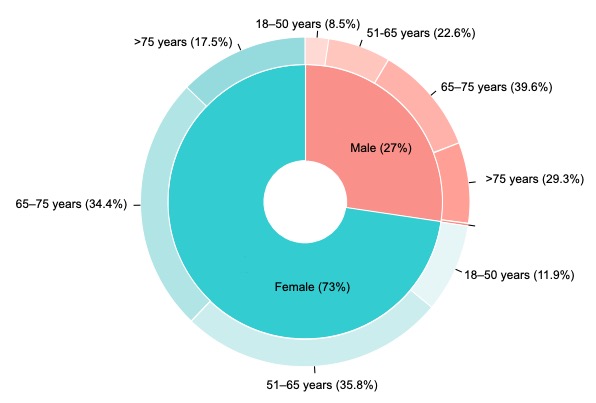


**Supplementary Figure S1. The distribution of sex (inner circle) and age (outer circle) among survey participants.**

**Supplementary Figure S2. Variables that were different (p<0.05) between the patient groups of better (green bars) or poorer (blue bars) well-being identified in the cluster analysis.**

**(**A) Experienced health status. (B) Life satisfaction. (C) Experienced loneliness. (D) Number of comorbidities. (E) Comorbidities. (F) Knowledge of the disease. (G) Life situation. (H) Economic situation.
